1                   **Stairway visual contrast enhancement to reduce fall-related events**

2  
3  
4  
5  
6  
7  
8  
9  
10  
11  
12  
13  
14  
15  
16  
17  
18  
19  
20  
21  
22  
23  
24  
25  
26  
27  
28  
29  
30  
31

Sara A. Harper <sup>1,2</sup>, Christopher Long <sup>1</sup>, Samantha Corbridge <sup>1</sup>, Tyson S. Barrett <sup>3</sup>, Alex Braeger <sup>1</sup>,  
Brevin J. Zollinger <sup>1</sup>, Amy E. Hale <sup>1</sup>, Chayston B. Brown <sup>1</sup>, Kenneth Harrison <sup>1</sup>, Shandon L.  
Poulsen <sup>1</sup>, Travis Boman <sup>1</sup>, Christopher J. Dakin <sup>1,2\*</sup>

<sup>1</sup> Department of Kinesiology and Health Science, Utah State University, Logan, UT, USA

<sup>2</sup> Sorenson Legacy Foundation Center for Clinical Excellence, Utah State University, Logan, UT,  
USA

<sup>3</sup> Department of Psychology, Utah State University, Logan, UT, USA

Running Head: Stairway visual contrast enhancement

Manuscript Type: Research Article

Acknowledgements:

We would like thank Emmalee Rolfe, McKay Wilding, and Erika Larson for their assistance coding video observations and Utah State University Facilities for installing the video cameras and striping intervention.

The research support was provided by Utah State University Undergraduate Research & Creative Opportunity (URCO) Award (2020 – Christopher Long, Samantha Corbridge), American Heart Association (Postdoctoral Fellowship 20POST34990005 Sara A. Harper).

Correspondence:  
Christopher J. Dakin  
chris.dakin@usu.edu  
Tel.: 435-797-7324

32 **ABSTRACT**

33 Falls on stairs occur frequently and pose a significant health and financial risk. Laboratory  
34 research has found that fall frequency can be reduced through contrast enhancement of the stairs  
35 by applying vinyl striping to the first and last steps' faces, and all the steps' top edges. Here we  
36 sought to determine if such step contrast enhancement can reduce the probability of fall-related  
37 events such as loss of balance, slips, trips, and falls in public university staircases. Cameras were  
38 used to capture stair users' ascent and descent on contrast enhanced ('striped') and control  
39 stairways. Observed age group, observed gender, traverse direction (ascent, descent), fall-related  
40 events, and walking speed (m/s) were recorded. Fall-related events were reduced for the striped  
41 stairway compared to the control stairway (odds ratio = 2.87, average marginal effect = 0.002, p  
42 = .023) when controlling for observed gender, age category, and traverse direction. These results  
43 suggest contrast enhancement of first and last steps' face and all steps' edges may reduce fall-  
44 related events in public settings. Adding contrast enhancement to public stairways is a simple  
45 and cost-effective way to reduce the loss of balance, slips, and trips that could lead to  
46 catastrophic falls on stairs as well as the health and financial burden associated with such falls.

47 **KEYWORDS:** Slips and falls; Accidents, human error; Interventions; Experimental Design;  
48 Motor Behavior

49

50 **PRECIS:** Contrast enhancement of stairway features may be a simple and cost-effective way to  
51 reduce falls on stairs. We show that monochrome striping on the first and last steps' faces and  
52 black stripes on steps' top edges reduce the probability of fall-related events in public stairways.

53

## 54 INTRODUCTION

55           Approximately 3,000 people injure themselves falling on stairs every year in the United  
56 States, resulting in annual fall-related medical costs of approximately \$92 billion (Blazewick et  
57 al., 2018). Moreover, individuals who have experienced one such fall are prone to fall again thus  
58 increasing the likelihood of serious injury (Masud & Morris, 2001). Thus, it is crucial that fall  
59 prevention strategies be researched and implemented to reduce the financial and health burden  
60 associated with falls on stairways.

61           The likelihood of a fall depends on a variety of factors affecting balance that are  
62 accentuated by visual, hearing, and muscular strength deficits (Elliott et al., 2015) associated  
63 with aging. Visual deficits, in particular, increase the likelihood of a fall on stairs (Brundle et al.,  
64 2015; Simoneau, Cavanagh, Ulbrecht, Leibowitz, & Tyrrell, 1991) because vision provides  
65 information about the environment that is necessary to adjust foot placement and foot clearance  
66 (Buckley, Timmis, Scally, & Elliott, 2011; Graci, Elliott, & Buckley, 2010). Often interventions  
67 such as strength and balance training are undertaken to prevent falls. However, these  
68 interventions typically require a significant commitment from the individual (Mian et al., 2007)  
69 and take time to meaningfully reduce the likelihood of falls (El-Khoury et al., 2013). In contrast,  
70 an environmental intervention, such as improving the visibility of features of the stairs, avoids  
71 the financial, time, and physical burdens associated with training interventions. In addition,  
72 environmental interventions such as stairway visibility improvements are often easily  
73 implemented in a public setting (Foster, Hotchkiss, Buckley, & Elliott, 2014).

74           By improving the visibility of the stairs, stair users' gait can be altered to reduce the  
75 likelihood of fall. Some results of these gait alterations include increased toe clearance, increased  
76 heel clearance, faster walking speed, or reduced kinematic variance (Cohen & Sloan, 2016; den

77 Brinker et al., 2005; D. B. Elliott, Foster, Whitaker, Scally, & Buckley, 2015; David B. Elliott,  
78 Vale, Whitaker, & Buckley, 2009; Foster, Buckley, Whitaker, & Elliott, 2016; Foster et al.,  
79 2014; Foster, Whitaker, Scally, Buckley, & Elliott, 2015; Jacobs, 2016; Schofield, Curzon-Jones,  
80 & Hollands, 2017; Shaheen et al., 2018; Skervin et al., 2021; Thomas et al., 2021; Zietz,  
81 Johannsen, & Hollands, 2011). In fact, Elliott, Foster and colleagues have demonstrated that  
82 vertical, monochrome striping on the face of the bottom and top steps can increase vertical foot  
83 clearance 0.8 cm for young adults and up to 2.1 cm for older adults (D. B. Elliott et al., 2015;  
84 David B. Elliott et al., 2009; Foster et al., 2016; Foster et al., 2015; Skervin et al., 2021), with 1.0  
85 cm, a 17.5% improvement, in toe clearance observed in older adults. Importantly, introducing the  
86 vertical monochrome striping intervention to both the top and bottom steps maximized the  
87 vertical toe clearance effect, compared to no vertical striping, striping only the bottom step, or  
88 striping only the top step (D. B. Elliott et al., 2015; Foster et al., 2015). In addition, the effect of  
89 the monochrome vertical striping is also maximized when the spatial frequency of the stripes is  
90 approximately 12 cycles or stripes per meter compared to four, eight, 16 and 20 cycles per step  
91 (D. B. Elliott et al., 2015; Foster et al., 2015; Skervin et al., 2021).

92 Heel clearance can also be increased [ $(3.2 \pm 1.9$  cm to  $4.7 \pm 1.4$  cm; effect size 1.07 (3)]  
93 by adding high contrast visual strips along the top front edge of all the steps (Cohen & Sloan,  
94 2016; den Brinker et al., 2005; D. B. Elliott et al., 2015; Foster et al., 2014; Thomas et al., 2021;  
95 Zietz et al., 2011). The addition of high contrast edging to each step has been shown to increase  
96 heel clearance during descent (<5 mm) and reduce the number of times the foot accidentally  
97 contacts steps' edges (D. B. Elliott et al., 2015). Importantly, while these two environmental  
98 interventions are independently effective, their combined effect may be greater than each  
99 intervention on their own (Foster et al., 2015).

100           Implemented together, these visual interventions represent a promising way to reduce  
101 locomotor behaviors that increase the likelihood of a fall. However, since these observations  
102 largely derive from laboratory settings, the size of these environmental interventions' effect in  
103 public environments remains unclear. Specifically, laboratory investigations lack the wide range  
104 of influences and distractions present in public environments and it is unclear how large an effect  
105 the changes in toe and heel clearance observed in the lab have on the probability of a fall on  
106 public stairs (Edwards, Dulai, & Rahman, 2019). Therefore, public validation is an essential next  
107 step in determining the efficacy of such a visual, environmental intervention on reducing the  
108 probability of a fall.

109           Here, we sought to determine if a) enhancing contrast of the steps' edges using black  
110 strips, and b) enhancing the visibility of the first and last steps' face by adding vertical striping  
111 would reduce the probability of fall-related events such as loss of balance, slips, trips, and falls in  
112 a public setting. We compared the probability of observing fall-related events between a stairway  
113 with the contrast enhancements and a stairway without the contrast enhancements. We  
114 hypothesized that the probability of fall-related events (e.g., loss of balance, slips, trips, and falls)  
115 would be reduced in the intervention stairway compared to the control stairway.

116

## 117 **MATERIALS AND METHODS**

### 118 **Participants**

119           To test the efficacy of the contrast enhancement intervention, users of the East and West  
120 stairways in Utah State University's Health, Physical Education and Recreation (HPER) building  
121 were recorded on video. The sample consisted largely of individuals attending Lifetime Wellness  
122 or Kinesiology courses (e.g., dance, yoga, and laboratory). It is important to note that the study

123 was planned prior to the COVID-19 pandemic, when normally the HPER building has extensive  
124 programming, open to community members, including water aerobics, employee wellness  
125 aerobic and weight room, racquetball courts, and gymnasiums. Because data collection took  
126 place between September 2020 and February 2021, during the COVID-19 pandemic, the sample  
127 was skewed more toward university students than would usually be the case. Stair users  
128 appearing under the age of 18 were excluded from data collection (n = 2, See supplemental table)  
129 and the subsequent analysis. The study was approved by the institutional review board at Utah  
130 State University (Protocol #10773).

### 131 **Protocol**

132 Four security cameras were placed in both the East and West stairways of the HPER  
133 building to capture stair users' ascent and descent of the respective stairways. Security cameras  
134 (Lorex cameras, Lorex Technology Inc., Markham, CA, USA) were set to record based on  
135 motion detected prior to entry into the stairway and therefore video was captured for the entirety  
136 of the stair negotiation process. Signage was posted at the entry to both stairways indicating that  
137 security cameras were recording activity in the stairway. Video was recorded on a digital video  
138 recorder and recordings were transferred multiple times per week, via a secure universal serial  
139 bus (USB) device, to a secure cloud storage unit (Box, Inc. Redwood City, CA, USA). The East  
140 stairway consisted of 11 steps (0.16 – 0.17 m step height, 0.32 – 0.33 m in tread depth, with an  
141 overall hypotenuse length of 3.75 – 3.77 m) and the West stairway consisted of 13 steps (0.16 –  
142 0.17 m step height, 0.32 – 0.33 m tread depth, and 4.49 – 4.53 m hypotenuse length).

### 143 **Intervention**

144 Monochrome striping of the stair face consisted of 19 black vertical vinyl stripes (12  
145 cycles/1 meter) on a white background along the face of the bottom and top stairs. Contrast

146 enhancement of each steps' edge consisted of 5.5 cm black vinyl strips (stair tread depth) applied  
147 to the top front edges of each step as done previously (D. B. Elliott et al., 2015; Foster et al.,  
148 2014; Foster et al., 2015). The control stairway was unaltered and used to compare to the  
149 contrast enhanced intervention stairway. After 5,000 individual stair users were coded, the  
150 stairway used as the intervention and control stairways were switched (counter-balanced)  
151 (**Figure 1**). The cost of the vinyl striping material was approximately \$287.59 (USD) for the two  
152 stairways including counter-balancing.

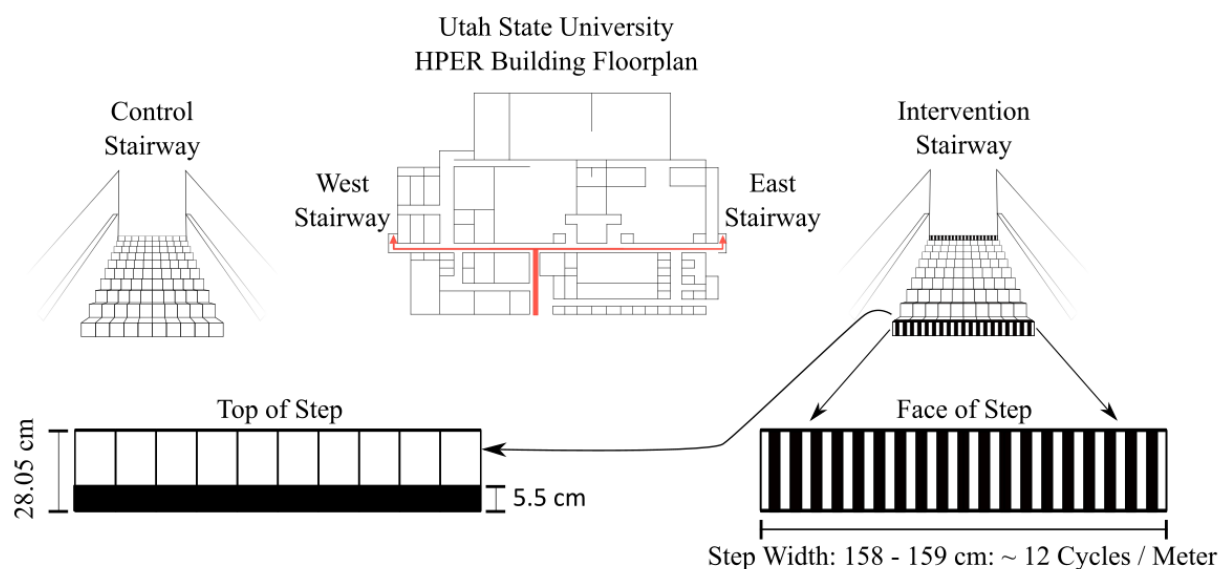

153  
154 **Figure 1. Study stairway locations.** Schematic of the Health, Physical Education, and Recreation (HPER) building.  
155 Note: red arrows indicate the West and East stairways (upper middle). Visual representations of the control stairway  
156 condition (top left) and striping intervention (top right). Halfway through data collection, the intervention and  
157 control stairways were switched. The top front edge of steps in the intervention stairway were covered with a 5.5 cm  
158 black strip (bottom left) whereas the face of the first and last step of the intervention stairway were covered in a  
159 monochrome striping pattern with a spatial frequency of 12 stripes/meter (bottom right). The two stairways were  
160 approximately 112m apart.  
161

162 In total, 12,285 individual observations were coded and balanced across each condition  
163 (intervention, control) and stairway (East, West). After accounting for incomplete observations,  
164 the complete data set included 2,500 individual observations coded for each of the conditions

165 and stairways (i.e., East intervention, East control, West intervention, and West control each had  
166 2,500 observations).

## 167 **Measures**

168 Each outcome variable was assessed by stairway location (East stairway, West stairway)  
169 and condition (striping intervention, control). Both stairway light values were comparable  
170 between the upper and lower portions (approximately ~19 lux average absolute difference). We  
171 coded stairway users based on their observed gender (men, women), estimated age range (18-40,  
172 41-60, and 61+ years old), navigation direction (ascent, descent), date and time of day (24:00  
173 clock), walking speed (m/s), and fall-related event severity (mild, moderate, and severe). A mild  
174 fall-related event represented a relatively subtle trip or slip with minimal recovery action (**Figure**  
175 **2A**). A moderate fall-related event involved a loss in balance that required more substantial  
176 recovery such as a handrail reach (**Figure 2B**). A severe fall-related event represented a  
177 complete loss in balance, resulting in a fall (**Figure 2C**). Figure 2 has been removed aligned with  
178 pre-print policy. We encourage readers to contact the corresponding author to request access to  
179 **Figure 2**.

180 Stair users, if traversing the stairs in a group, were documented as being in a group. To  
181 account for multiple repeat observations of stair users, we recorded time of day and date of each  
182 observation (further details below in Data Analysis). Data were recorded and encoded using  
183 Microsoft Excel (Microsoft Corporation, Redmond, WA, USA).

## 184 **Quality Analysis**

185 To assess inter-coder reliability during data collection and encoding, each week one of  
186 the researchers would randomly select and evaluate ten percent of the data collected for that



187 week. If an error was present, a second coder reviewed all data recorded by the first coder for the  
188 week in question and the second coder made a determination on the final coding record.

### 189 **Data Cleaning**

190 Completed data entry consisted of 12,285 individual observations. In total, 1,148  
191 observations were removed and are described in the supplemental information with 11,137  
192 observations remaining for the final analysis. All observations were reviewed for missing or  
193 incomplete data. Next, observations were sorted by the time it took to traverse the stairs. All  
194 observations that took less than two seconds, or equal or greater than ten seconds to traverse the  
195 stairs were subject to additional review and removal to filter out unusual walking speeds. Next,  
196 individuals captured on video that were flagged for atypical events were reviewed and removed  
197 for the following reasons: use of assistive walking devices (e.g., walking boot, crutches, or knee  
198 brace), they were recorded outside of the designated data collection period (e.g., 17:01-6:59), or  
199 they did not use the stairs. In addition, all observations that involved stopping or pausing on the  
200 stairs or any unusual stair walking behaviors were removed (see Supplemental Information).

### 201 **Data Analysis**

202 All descriptive statistics are presented as the number of observations and a percentage of  
203 the total observations. In order to assess differences by condition (intervention versus control), a  
204 series of generalized linear mixed effects models were used. Two models were tested to assess  
205 differences between the conditions. The first model assessed the main effect of condition on fall-  
206 related events. The remaining model tested for interactions between conditions. Covariates, such  
207 as gender, age category. All types of fall-related events were pooled, given their relative sparsity  
208 in the sample, and were coded as either present (a fall-related event occurred) or not. Given fall-

209 related events were coded as binary, we used a Bernoulli (a special case of binomial) distribution  
210 and logit link for those models. For the fall-related events, these models can be expressed as:

$$211 \quad Y_{it} \sim \text{Bernoulli}(p_{it})$$

$$212 \quad \text{logit}(p_{it}) = \beta_0 + \beta_1 \times \text{condition}_{it} + \sum_k \text{covariates}_{it} + \alpha_t$$

$$213 \quad \alpha_t \sim N(\mu_t, \sigma_t^2)$$

214 where  $Y_{it}$  is the binary outcome,  $p_{it}$  is the probability of a fall-related event occurring (i.e.,

215  $\text{Prob}(y_{it} = 1)$ ),  $\beta_1$  is the estimate of interest, and  $\alpha_t$  is the random intercept by hour of the day.

216 The random intercept by hour of the day was selected to account for the clustering of individuals

217 by certain time points as well as a proxy to help account for multiple observations of the same

218 stair user given the challenge of identifying multiple observations of the same individual.

219 Although imperfect, it explained variation in the outcome across models. Hypothesis

220 significance testing for variables of interest was performed by comparing nested (i.e., more

221 parsimonious) models using likelihood ratio tests (Hox, 2017). Estimates are highlighted in terms

222 of both the odds ratio (relative differences) and the average marginal effect (absolute

223 differences). Outcome measures from the model are presented using predicted probabilities. All

224 statistical analyses were performed using R version 4.0.2. (Team, 2020) using the rio, tidyverse,

225 janitor, lme4, lmerTest, furniture, and gtsummary packages (Barrett T, 2017; Chung-hong Chan,

226 2018; Daniel D. Sjoberg, 2020; Douglas Bates, 2015; Firke, 2020; Kuznetsova A, 2017;

227 Wickham, 2019).

228

229 **RESULTS**

230 Overall, most stair users appeared to be between the ages of 18-40 years (98.5%) with  
231 only 0.82% being between the ages of 41-60 and 0.68% appearing older than 61 years old. From  
232 this sample we observed a total of 20 fall-related events including 12 mild fall-related events, 4  
233 moderate fall-related events, and 4 severe fall-related events. Of 11,137 complete observations,  
234 12.82% (1,428/11,137) observations were verified twice. Across the sample, after accounting for  
235 gender, age category, and ascending/descending, there were differences in walking speed by age  
236 ( $p < .001$ ), with observed young adults (18-40 years old) having the fastest stairway walking  
237 speed. Observed men also tended to walk faster than observed women ( $p < .001$ ). The  
238 differences in walking speed did not depend on whether the individual was ascending or  
239 descending the stairway ( $p = .112$ ).

240 **Table 1.** Participant characteristics.

| <b>Outcome variables</b>    | <b>Occurrences<br/>(percentage of total)</b> |
|-----------------------------|----------------------------------------------|
| Observed 18 - 40 years old  | 10,970 (98.50 %)                             |
| Observed 41 - 60 years old  | 91 (0.82%)                                   |
| Observed 61+ years old      | 76 (0.68%)                                   |
| Observed women              | 7,458 (66.97%)                               |
| Observed men                | 3,679 (33.03%)                               |
| Mild fall-related event     | 12 (0.108%)                                  |
| Moderate fall-related event | 4 (0.036%)                                   |
| Severe fall-related event   | 4 (0.036%)                                   |
| Total fall-related event    | 20 (0.18%)                                   |

241  
242 Our primary aim was to examine whether the striping intervention reduced the  
243 probability of fall-related events. Likelihood ratio tests indicated there was a statistically  
244 significant difference (odds ratio = 2.87, average marginal effect = 0.002,  $p = .023$ ), between the  
245 striped stairway ( $n = 6$  fall-related events) and the control stairway ( $n = 14$  fall-related events),  
246 with the striped stairway observing fewer fall-related events, on average, after controlling for

247 observed gender, age category, and ascending/descending. None of the covariates were  
248 significantly related to fall-related events. The estimated differences by condition are presented  
249 in **Figure 3**, which shows the predicted probabilities of each condition experiencing a fall-related  
250 event. This difference did not depend on whether the individual was ascending or descending ( $p$   
251 = .331).

252 **Figure 3. Stairway striping and fall-related events**

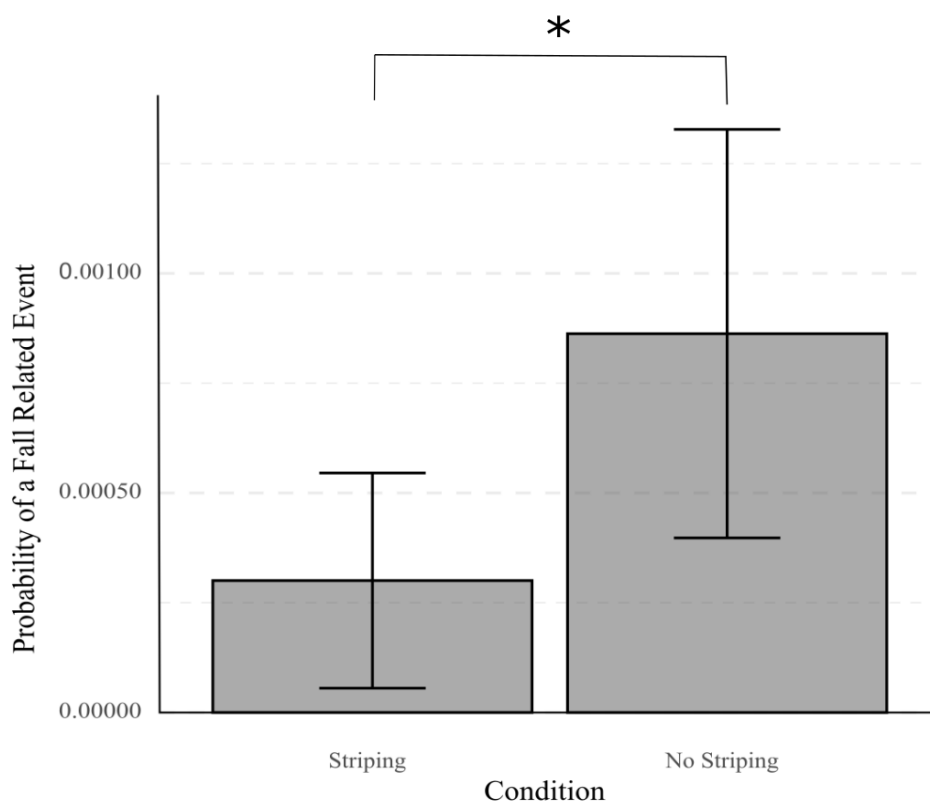

253  
254 **Figure 3.** Data are presented as estimated marginal mean  $\pm$  95% CI. Fall-related events decreased in the striped  
255 intervention stairways compared to the control stairways. \* indicates a statistically significant difference as  
256 determined using likelihood ratio tests to compare the fit of the nested generalized linear mixed effects models  $p <$   
257 .05.  
258

## 259 **DISCUSSION**

260 Here we sought to determine if contrast enhancement of features of the stairway can  
261 reduce the probability of experiencing a fall-related event in a public setting. We found that

262 enhancing the edge and face contrast of stairs reduced fall risk factors compared to a control  
263 stairway without the intervention. These results suggest that this intervention may be a cost-  
264 effective way to reduce the loss of balance, slips, and trips that contribute to falls in public  
265 environments.

266         We found that the combined visual contrast enhancement of step face and edge reduced  
267 the number of fall-related events compared to a control stairway without the intervention. The  
268 fact that this effect was observed in our sample is notable since the sample was highly skewed  
269 toward a higher proportion of observed young adults (18-40 years old) due to the COVID-19  
270 pandemic. While fall injuries are often reported among older adults, unintentional falls in young  
271 adults (18-35) represent the third most frequent causes of unintentional injury (Kool,  
272 Ameratunga, & Jackson, 2009). Young adults, in addition to older adults, could therefore also  
273 benefit from interventions meant to reduce fall-related events on stairways. Improvements in  
274 step contrast have been observed to increase foot step edge clearance in younger adults. In  
275 addition, younger adults with artificially induced visual impairments (20/200 vision) take smaller  
276 steps, and descend slower on low contrast stairways compared to high contrast stairways (David  
277 B. Elliott et al., 2009). Given that this intervention appears effective, at least to some degree, in  
278 younger adults, it is reasonable to believe it may be more effective in older adults, especially  
279 those with age-related declines in visual acuity (D. B. Elliott et al., 2015; Foster et al., 2014;  
280 Salvi, Akhtar, & Currie, 2006; Sjöstrand, Laatikainen, Hirvelä, Popovic, & Jonsson, 2011;  
281 Sjostrand, Bergman, & Popovic, 2004).

282         In a typical stairway, older adults with higher fall risk, determined by the Berg Balance  
283 Scale, Modified Falls Efficacy Scale, and Stair Self-Efficacy Questionnaire criteria, had both  
284 lower vertical tread clearance and lower step edge clearance compared to older adults with lower

285 fall risk. This suggests that older adults at higher fall risk may benefit further from contrast  
286 enhancement than peers with lower fall risk. Interestingly, high visual contrast appears to not  
287 only increased foot clearance, but also reduced vertical acceleration of the center of mass in older  
288 adults with a higher likelihood of falling. Collectively, stairs with high visual contrast improved  
289 foot step edge clearance in both young and older adults, and also led to improved metrics of  
290 balance control in older adults with higher fall risk (Zietz et al., 2011).

291         One major benefit of recording stair users directly, compared to some prior fall  
292 assessment studies, is that the video recordings allow for a more objective assessment of fall-  
293 related events. With video, fall-related events can be assessed with greater resolution and without  
294 the subjective interpretation of the event from the individual that experienced the fall. In  
295 addition, through video review, smaller events that the individual experiencing the event might  
296 forget or omit can be identified. However, valuable information has also been derived from self-  
297 report of falls. For example, two studies have assessed falls in young adults using daily surveys  
298 that asked participants whether they had slipped, tripped or fallen. When the past 24 hours were  
299 queried (Cho, Heijnen, Craig, & Rietdyk, 2021; Heijnen & Rietdyk, 2016) 30% of students  
300 reported falling (excluding winter weather conditions) with 14% of those falls occurring on stairs  
301 (Heijnen & Rietdyk, 2016). In contrast when the prior 16-weeks were queried 52% of students  
302 reported falling with 13% occurring on stairs (Cho et al., 2021). Compared to national health  
303 surveys, 10.6% of adults ages 18-44 years old (Verma et al., 2016), and 18.5% of 20-45 years  
304 old (Talbot, Musiol, Witham, & Metter, 2005) reported falling over a one year period. The  
305 difference in percent of respondents reporting a fall between the daily surveys and the national  
306 health surveys may reflect the strengths of daily surveys, which may catch events forgotten or  
307 omitted from an annual report. In addition, our data suggest that falls may also be underreported.

308 We observed that individuals fell once out of every five fall-related events or 20% of the time a  
309 fall related event occurred. In contrast, prior research indicates that students report falling, on  
310 average, once out of every 18 perceived slips or trips, a rate of 5.55% (Heijnen & Rietdyk,  
311 2016). Similarly, a more recent investigation reported that 6% of slips and 4% of trips resulted in  
312 falls (Cho et al., 2021). Our observation appears in line with previous reports of discrepancies  
313 between video and survey data. Specifically, a study examining falls in long term care facilities  
314 found that video data and survey data tend to disagree about the cause of the fall 55.5% of the  
315 time (Yang, Feldman, Leung, Scott, & Robinovitch, 2015). This discrepancy demonstrates the  
316 value of incorporating video capture for documentation of fall-related events. While video  
317 recordings may improve objective slip, trip, and fall identification and classification, challenges  
318 using this medium still exist (Woolrych et al., 2015). Indeed, a considerable amount of personnel  
319 and time were required to code video recordings in our investigation, which could increase the  
320 cost of such video review compared to the use of surveys.

### 321 **Limitations**

322 It is important to note that this study was planned prior to the COVID-19 pandemic, when  
323 normally the HPER building has extensive programming for all age groups and is open to  
324 community members (e.g., water aerobics, employee wellness aerobic and weight room,  
325 racquetball courts, and gymnasiums). However, data collection occurred during the COVID-19  
326 pandemic, which reduced the number of mid-life and older adults that frequented the building  
327 leading to a sample skewed more towards young adults than was initially planned. This also  
328 likely led to fewer fall-related events. In addition, because our investigation observed stair users  
329 in a building that houses the Kinesiology and Health Science Department students, staff, and  
330 faculty, it is likely that the individuals we observed were more athletic on average, than non-

331 users of this building. As a result of these limitations, it is possible that the effect size we  
332 observed is smaller than would be observed with a more heterogenous sample. Furthermore,  
333 because each stair user could not be directly queried, we estimated stair users' age and gender in  
334 addition to introducing a date and time factor to account for multiple observations. It is important  
335 to note that because observed age and gender were estimated from video recordings, the  
336 precision of these measures is lower than if stair users were queried for these variables directly.  
337 Similarly, introducing a date and time variable is a less precise approach to account for multiple  
338 observations compared to having and using each individual's identity. While our analysis did  
339 assess the time of day of repeat observations of stair users, time of day only explained  
340 approximately 1% of the variance in the data.

341

#### 342 **Future directions**

343 Although our investigation addressed our initial research question, additional questions  
344 now arise. Future work should consider observing a more heterogenous sample with a broader  
345 distribution of age ranges, emphasizing middle-age and older-age adult inclusion. Since falls  
346 disproportionately affect older adults, studies targeting older adults may provide additional insight  
347 into whether real life application of visual contrast enhancement of stairs will assist those most in  
348 need. In addition, future work could consider implementing machine learning fall detection  
349 software or programming which may eliminate the personnel resource for monitoring and  
350 detecting stair negotiation behavior and fall-related events (Shu & Shu, 2021).

351

#### 352 **CONCLUSIONS**



353 Here we built upon visual contrast stair inventions that have been evaluated in the laboratory by  
354 implementing such an intervention in a public setting (Edwards et al., 2019; D. B. Elliott et al.,  
355 2015; Jacobs, 2016; Skervin et al., 2021). We found that the enhancement of visual contrast of  
356 the first and last steps' face and all steps' edges reduced the number of fall-related events. Since  
357 the effect was still observed in a sample of primarily young adults, our results suggest that such  
358 visual contrast enhancements may represent a simple and inexpensive intervention to reduce loss  
359 of balance, slips, and trips that can lead to catastrophic falls on stairs across all populations. Such  
360 interventions could reduce the health and financial burden associated with falls on stairways.  
361

362 **Supplemental Information.**

| <b>Removed observations (n=1,148)</b>                                               | <b>Frequency (percentage)</b> |
|-------------------------------------------------------------------------------------|-------------------------------|
| Outside of time frame (17:01-6:59)                                                  | 184 (16.03%)                  |
| Wrong camera angle (e.g., platform camera angle)                                    | 120 (10.45%)                  |
| Partial device use (e.g., phone, smart watch)                                       | 101 (8.80%)                   |
| Researcher in video (retrieving data files)                                         | 80 (6.97%)                    |
| Missing stair start time                                                            | 71 (6.18%)                    |
| Reserve Officers' Training Corps on stairs                                          | 66 (5.75%)                    |
| Assistant walking devices<br>(e.g., walking boot, crutches, knee brace, or limping) | 62 (5.40%)                    |
| Looked or waved at a camera                                                         | 48 (4.18%)                    |
| No stair use (did not step on stairs)                                               | 45 (3.92%)                    |
| Stopped or paused on stairs                                                         | 45 (3.92%)                    |
| No individual in video (e.g., lighting change)                                      | 36 (3.14%)                    |
| Maintenance (e.g., cleaning, janitor)                                               | 21 (1.83%)                    |
| Jumped a portion of stairs                                                          | 18 (1.57%)                    |
| Partial stair use or partial video recording of stair use                           | 17 (1.48%)                    |
| Vending machine use                                                                 | 11 (0.96%)                    |
| Pretending to fall or have balance issues                                           | 7 (0.61%)                     |
| Stretched on stairs, sat on stairs                                                  | 6 (0.52%)                     |
| Played tennis on stairs, bouncing paddle ball                                       | 4 (0.35%)                     |
| Reviewed stair striping                                                             | 4 (0.35%)                     |
| Unusual stair behavior                                                              | 3 (0.26%)                     |
| Slide down handrail                                                                 | 3 (0.26%)                     |
| Takes shoes off on stairs or in socks                                               | 3 (0.26%)                     |
| Dropped something on stairs                                                         | 3 (0.26%)                     |
| Talking to someone not on stairs                                                    | 2 (0.17%)                     |
| Observed age under 18 years old                                                     | 2 (0.17%)                     |
| Unconfirmed phone use                                                               | 2 (0.17%)                     |
| Switches phone use hand on stairs                                                   | 1 (0.09%)                     |
| Video and description do not match                                                  | 1 (0.09%)                     |

363 Note. Duplicate codes were present.

364

365 **KEY POINTS**

- 366       • Contrast enhancement of features of stairways may be an effective way to reduce falls on  
367       stairs.
- 368       • We show that monochrome striping on the first and last steps' faces and black stripes on  
369       steps' edges reduced the probability of fall-related events in public stairways.

370

## REFERENCES

- 371 Barrett T, B. E. (2017). Furniture for quantitative scientists. *The R Journal*, 9(2), 142-148.  
372 doi:10.32614/RJ-2017-037
- 373 Brundle, C., Waterman, H. A., Ballinger, C., Olleveant, N., Skelton, D. A., Stanford, P., & Todd,  
374 C. (2015). The causes of falls: views of older people with visual impairment. *Health*  
375 *Expect*, 18(6), 2021-2031. doi:10.1111/hex.12355
- 376 Buckley, J. G., Timmis, M. A., Scally, A. J., & Elliott, D. B. (2011). When is visual information  
377 used to control locomotion when descending a kerb? *PLoS ONE*, 6(4), e19079.  
378 doi:10.1371/journal.pone.0019079
- 379 Cho, H., Heijnen, M. J. H., Craig, B. A., & Rietdyk, S. (2021). Falls in young adults: The effect  
380 of sex, physical activity, and prescription medications. *PLoS ONE*, 16(4), e0250360.  
381 doi:10.1371/journal.pone.0250360
- 382 Chung-hong Chan, G. C. C., Thomas J. Leeper, and Jason Becker (2018). rio: A Swiss-army  
383 knife for data file I/O. (Version R package version 0.5.16.).
- 384 Cohen, H. H., & Sloan, G. D. (2016). The science behind codes and standards for safe pedestrian  
385 walkways: lighting and visual cues. *Appl Ergon*, 52, 112-119.  
386 doi:10.1016/j.apergo.2015.07.002
- 387 Daniel D. Sjoberg, M. C., Margie Hannum, Karissa Whiting and Emily C. Zabor (2020).  
388 gtsummary: Presentation-Ready Data Summary and Analytic Result Tables. (Version. R  
389 package version 1.3.5. ). Retrieved from [https://CRAN.R-](https://CRAN.R-project.org/package=gtsummary)  
390 [project.org/package=gtsummary](https://CRAN.R-project.org/package=gtsummary)
- 391 den Brinker, B. P. L. M., Burgman, L. J., Hogervorst, S. M. J., Reehorst, S. E., Kromhout, S., &  
392 van der Windt, J. (2005). The effect of high-contrast marking of treads on the descent of  
393 stairways by low-vision people. *International Congress Series*, 1282, 502-506.  
394 doi:doi.org/10.1016/j.ics.2005.05.165
- 395 Douglas Bates, M. M., Ben Bolker, Steve Walker. (2015). Fitting Linear Mixed-Effects Models  
396 Using Ime4. *Journal of Statistical Software*, 67(1), 1-48. doi:doi:10.18637/jss.v067.i01.
- 397 Edwards, N., Dulai, J., & Rahman, A. (2019). A scoping review of epidemiological, ergonomic,  
398 and longitudinal cohort studies examining the links between stair and bathroom falls and  
399 the built environment. *International journal of environmental research and public health*,  
400 16(9), 1598. doi:10.3390/ijerph16091598
- 401 Elliott, D. B., Foster, R. J., Whitaker, D., Scally, A. J., & Buckley, J. G. (2015). Public Health  
402 Research. In *Analysis of lower limb movement to determine the effect of manipulating the*  
403 *appearance of stairs to improve safety: a linked series of laboratory-based, repeated*  
404 *measures studies*. Southampton (UK): NIHR Journals Library.
- 405 Elliott, D. B., Vale, A., Whitaker, D., & Buckley, J. G. (2009). Does my step look big in this? A  
406 visual illusion leads to safer stepping behaviour. *PLoS ONE*, 4(2), e4577.  
407 doi:10.1371/journal.pone.0004577
- 408 Firke, S. (2020). janitor: Simple Tools for Examining and Cleaning Dirty Data. (Version R  
409 package version 2.0.1. ). Retrieved from <https://CRAN.R-project.org/package=janitor>
- 410 Foster, R. J., Buckley, J. G., Whitaker, D., & Elliott, D. B. (2016). The addition of stripes (a  
411 version of the 'horizontal-vertical illusion') increases foot clearance when crossing low-  
412 height obstacles. *Ergonomics*, 59(7), 884-889. doi:10.1080/00140139.2015.1105304

- 413 Foster, R. J., Hotchkiss, J., Buckley, J. G., & Elliott, D. B. (2014). Safety on stairs: influence of a  
414 tread edge highlighter and its position. *Exp Gerontol*, *55*, 152-158.  
415 doi:10.1016/j.exger.2014.04.009
- 416 Foster, R. J., Whitaker, D., Scally, A. J., Buckley, J. G., & Elliott, D. B. (2015). What you see is  
417 what you step: the horizontal-vertical illusion increases toe clearance in older adults  
418 during stair ascent. *Invest Ophthalmol Vis Sci*, *56*(5), 2950-2957. doi:10.1167/iovs.14-  
419 16018
- 420 Graci, V., Elliott, D. B., & Buckley, J. G. (2010). Utility of peripheral visual cues in planning  
421 and controlling adaptive gait. *Optom Vis Sci*, *87*(1), 21-27.  
422 doi:10.1097/OPX.0b013e3181c1d547
- 423 Heijnen, M. J., & Rietdyk, S. (2016). Falls in young adults: Perceived causes and environmental  
424 factors assessed with a daily online survey. *Hum Mov Sci*, *46*, 86-95.  
425 doi:10.1016/j.humov.2015.12.007
- 426 Hox, J. J., Moerbeek, M., & Van de Schoot, R. . (2017). Multilevel analysis: Techniques and  
427 applications. .
- 428 Jacobs, J. V. (2016). A review of stairway falls and stair negotiation: Lessons learned and future  
429 needs to reduce injury. *Gait Posture*, *49*, 159-167. doi:10.1016/j.gaitpost.2016.06.030
- 430 Kool, B., Ameratunga, S., & Jackson, R. (2009). The role of alcohol in unintentional falls among  
431 young and middle-aged adults: a systematic review of epidemiological studies. *Injury*  
432 *Prevention*, *15*(5), 341. doi:10.1136/ip.2008.021303
- 433 Kuznetsova A, B. P., Christensen RHB (2017). lmerTest Package: Tests in Linear Mixed Effects  
434 Models.” *Journal of Statistical Software*, *82*(13), 1-26. doi:doi: 10.18637/jss.v082.i13
- 435 Salvi, S. M., Akhtar, S., & Currie, Z. (2006). Ageing changes in the eye. *Postgraduate medical*  
436 *journal*, *82*(971), 581-587. doi:10.1136/pgmj.2005.040857
- 437 Schofield, A. J., Curzon-Jones, B., & Hollands, M. A. (2017). Reduced sensitivity for visual  
438 textures affects judgments of shape-from-shading and step-climbing behaviour in older  
439 adults. *Exp Brain Res*, *235*(2), 573-583. doi:10.1007/s00221-016-4816-0
- 440 Shaheen, A. F., Sourlas, A., Horton, K., McLean, C., Ewins, D., Gould, D., & Ghoussayni, S.  
441 (2018). Effects of lighting illuminance levels on stair negotiation performance in  
442 individuals with visual impairment. *J Electromyogr Kinesiol*, *39*, 8-15.  
443 doi:10.1016/j.jelekin.2018.01.004
- 444 Shu, F., & Shu, J. (2021). An eight-camera fall detection system using human fall pattern  
445 recognition via machine learning by a low-cost android box. *Scientific Reports*, *11*(1),  
446 2471. doi:10.1038/s41598-021-81115-9
- 447 Simoneau, G. G., Cavanagh, P. R., Ulbrecht, J. S., Leibowitz, H. W., & Tyrrell, R. A. (1991).  
448 The influence of visual factors on fall-related kinematic variables during stair descent by  
449 older women. *J Gerontol*, *46*(6), M188-195. doi:10.1093/geronj/46.6.m188
- 450 Sjöstrand, J., Laatikainen, L., Hirvelä, H., Popovic, Z., & Jonsson, R. (2011). The decline in  
451 visual acuity in elderly people with healthy eyes or eyes with early age-related  
452 maculopathy in two Scandinavian population samples. *Acta Ophthalmol*, *89*(2), 116-123.  
453 doi:10.1111/j.1755-3768.2009.01653.x
- 454 Sjostrand, J. B., Bergman, B., & Popovic, Z. (2004). Declining visual acuity in healthy eyes with  
455 age. Calculation of loss of retinal ganglion cells in the elderly and old. *Investigative*  
456 *Ophthalmology & Visual Science*, *45*(13), 5462-5462.
- 457 Skervin, T. K., Thomas, N. M., Schofield, A. J., Hollands, M. A., Maganaris, C. N., & Foster, R.  
458 J. (2021). The next step in optimising the stair horizontal-vertical illusion: Does a

- 459 perception-action link exist in older adults? *Exp Gerontol*, 149, 111309.  
460 doi:10.1016/j.exger.2021.111309
- 461 Talbot, L. A., Musiol, R. J., Witham, E. K., & Metter, E. J. (2005). Falls in young, middle-aged  
462 and older community dwelling adults: perceived cause, environmental factors and injury.  
463 *BMC Public Health*, 5, 86. doi:10.1186/1471-2458-5-86
- 464 Team, R. C. (2020). R: A language and environment for statistical computing. R Foundation for  
465 Statistical Computing.
- 466 Thomas, N. M., Skervin, T. K., Foster, R. J., Parr, J. V., Carpenter, M. G., O'Brien, T. D., . . .  
467 Hollands, M. A. (2021). Influence of step-surface visual properties on confidence,  
468 anxiety, dynamic stability, and gaze behaviour in young and older adults. *Human*  
469 *Movement Science*, 77, 102774. doi:doi.org/10.1016/j.humov.2021.102774
- 470 Verma, S. K., Willetts, J. L., Corns, H. L., Marucci-Wellman, H. R., Lombardi, D. A., &  
471 Courtney, T. K. (2016). Falls and Fall-Related Injuries among Community-Dwelling  
472 Adults in the United States. *PLoS ONE*, 11(3), e0150939-e0150939.  
473 doi:10.1371/journal.pone.0150939
- 474 Wickham. (2019). Welcome to the Tidyverse *Journal of Open Source Software*, 4(43), 1686.  
475 Retrieved from <https://doi.org/10.21105/joss.01686>
- 476 Woolrych, R., Zecevic, A., Sixsmith, A., Sims-Gould, J., Feldman, F., Chaudhury, H., . . .  
477 Robinovitch, S. N. (2015). Using video capture to investigate the causes of falls in long-  
478 term care. *Gerontologist*, 55(3), 483-494. doi:10.1093/geront/gnu053
- 479 Yang, Y., Feldman, F., Leung, P. M., Scott, V., & Robinovitch, S. N. (2015). Agreement  
480 Between Video Footage and Fall Incident Reports on the Circumstances of Falls in Long-  
481 Term Care. *J Am Med Dir Assoc*, 16(5), 388-394. doi:10.1016/j.jamda.2014.12.003
- 482 Zietz, D., Johannsen, L., & Hollands, M. (2011). Stepping characteristics and Centre of Mass  
483 control during stair descent: Effects of age, fall risk and visual factors. *Gait Posture*,  
484 34(2), 279-284. doi:10.1016/j.gaitpost.2011.05.017

485
